# Supplementary material
Source: PubMed Central journal article supplement (PMC10201610)
Supplement: NIHPP2023.01.24.525348v2-supplement-1.pdf [file NIHPP2023.01.24.525348v2-supplement-1.pdf]

1176 **10. Supplement**

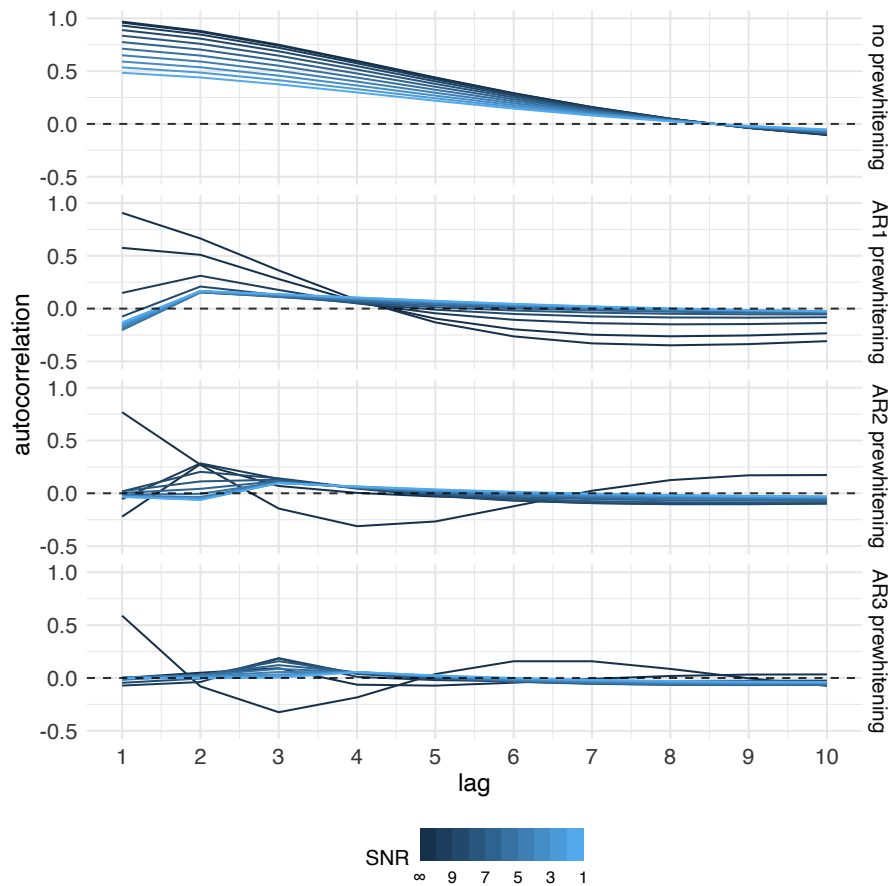

Figure S1: **The autocorrelation function of simulated data as a function of whitening order and noise.** The mean autocorrelation function was computed over all participants and regions. In general, noise and whitening reduced absolute autocorrelation. The shape of the autocorrelation function varied as a function of noise and whitening. In case without whitening, autocorrelation monotonically decreased and reached 0 at lag 8. After whitening, autocorrelation varied between positive and negative values, and this was most pronounced in cases without noise. The autocorrelation function was more similar to the experimental data in cases with low levels of noise.

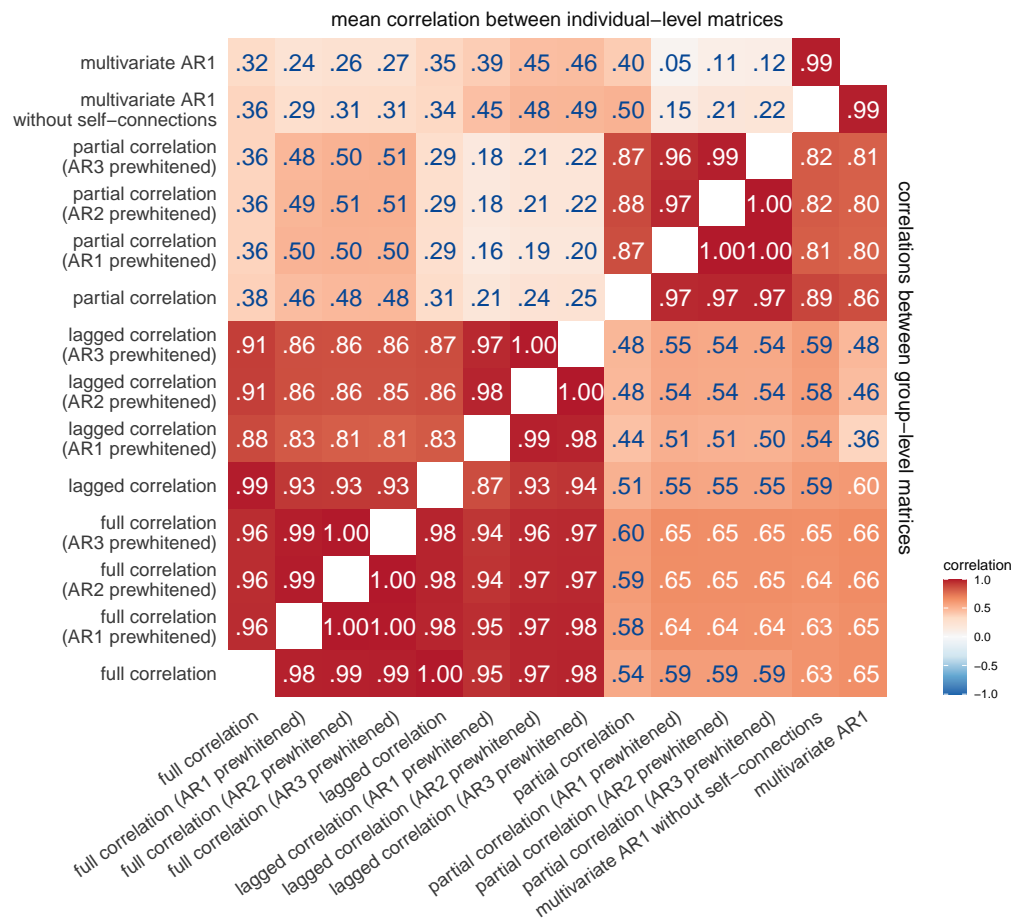

Figure S2: **Correlations between connectivity methods.** Same as in Figure 2A but includes all orders of prewhitening.

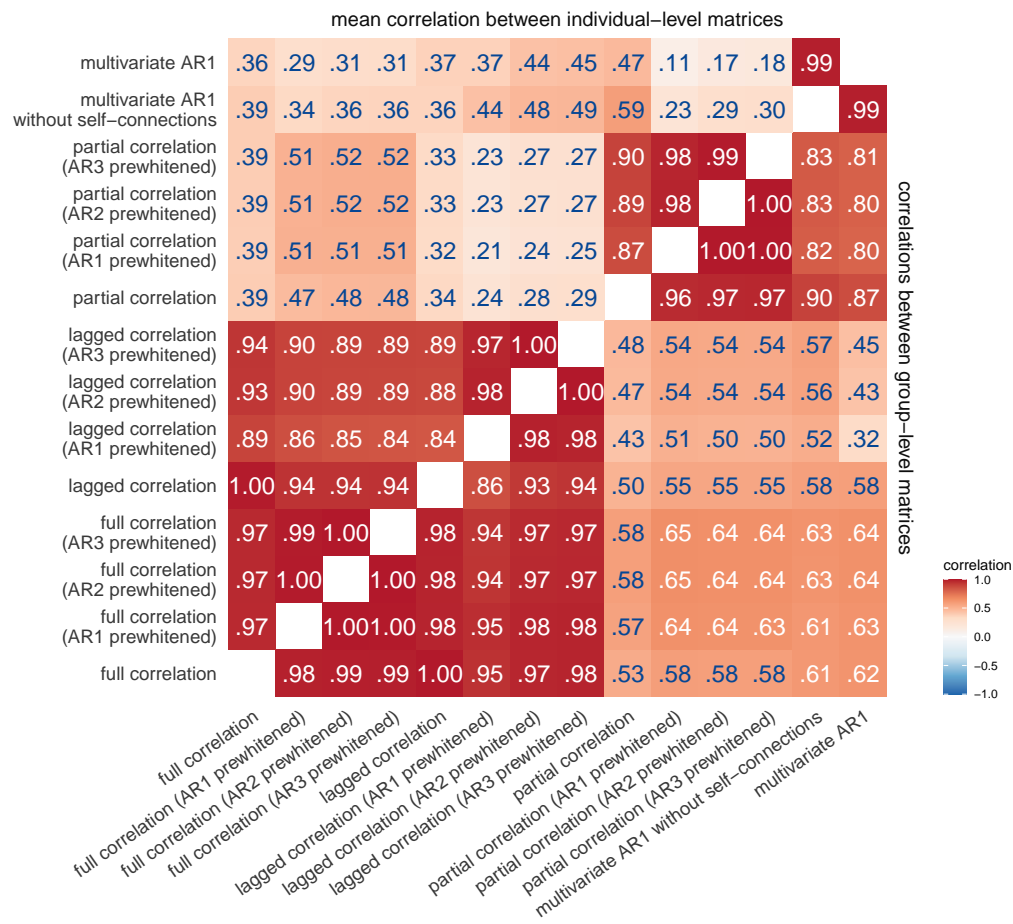

Figure S3: Correlations between connectivity methods on 200 participants with highest quality data.

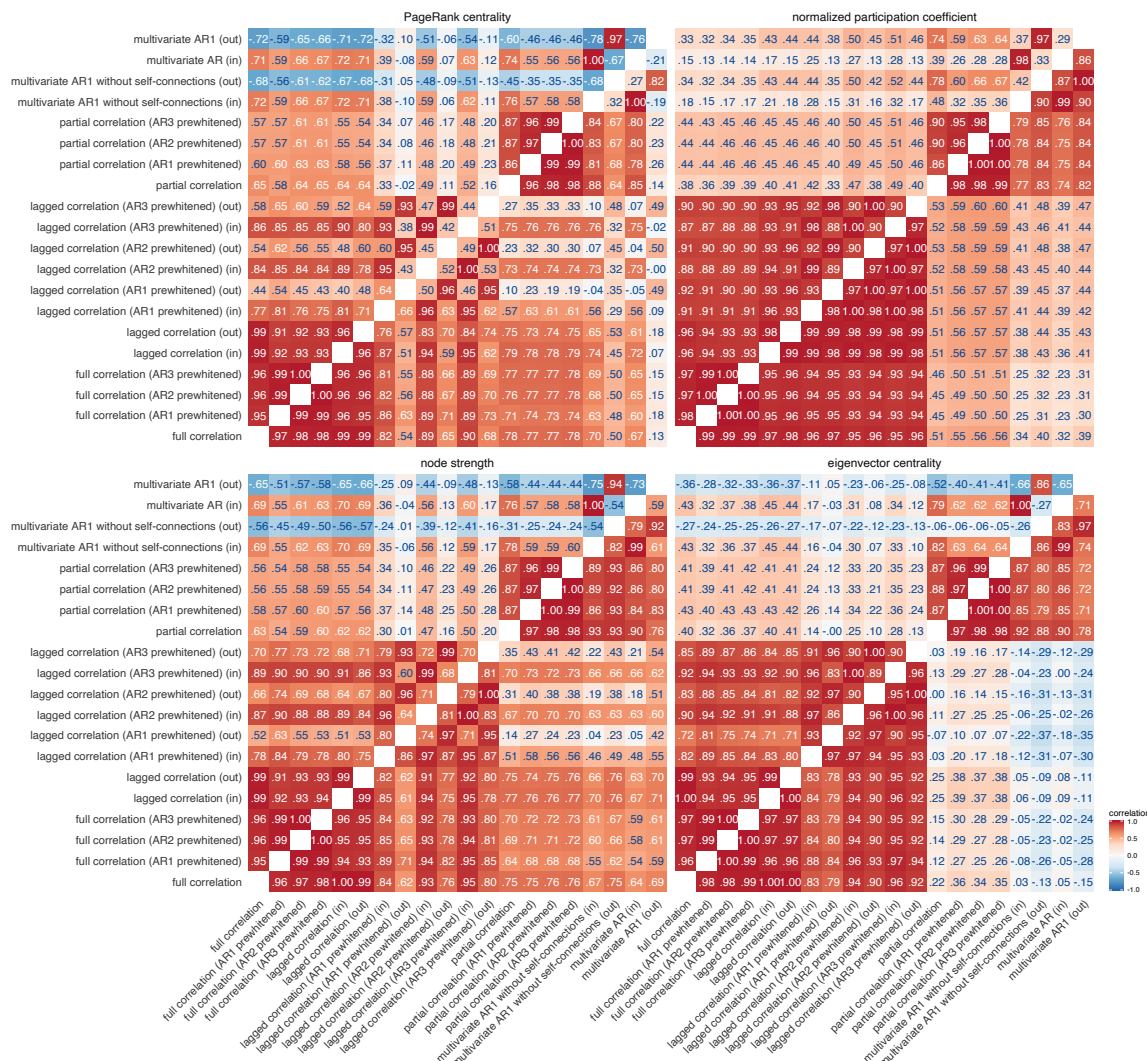

Figure S4: **Similarities between node centrality measures based on positive connections.** Similarities were estimated by (i) computing node measures on group-average connectivity matrices (group-level comparison; below diagonal), (ii) by computing node measures for each individual separately, correlating within participant and averaging these correlations across participants (individual-level comparison; above diagonal). Same as in Figure 4, but includes prewhitened data.

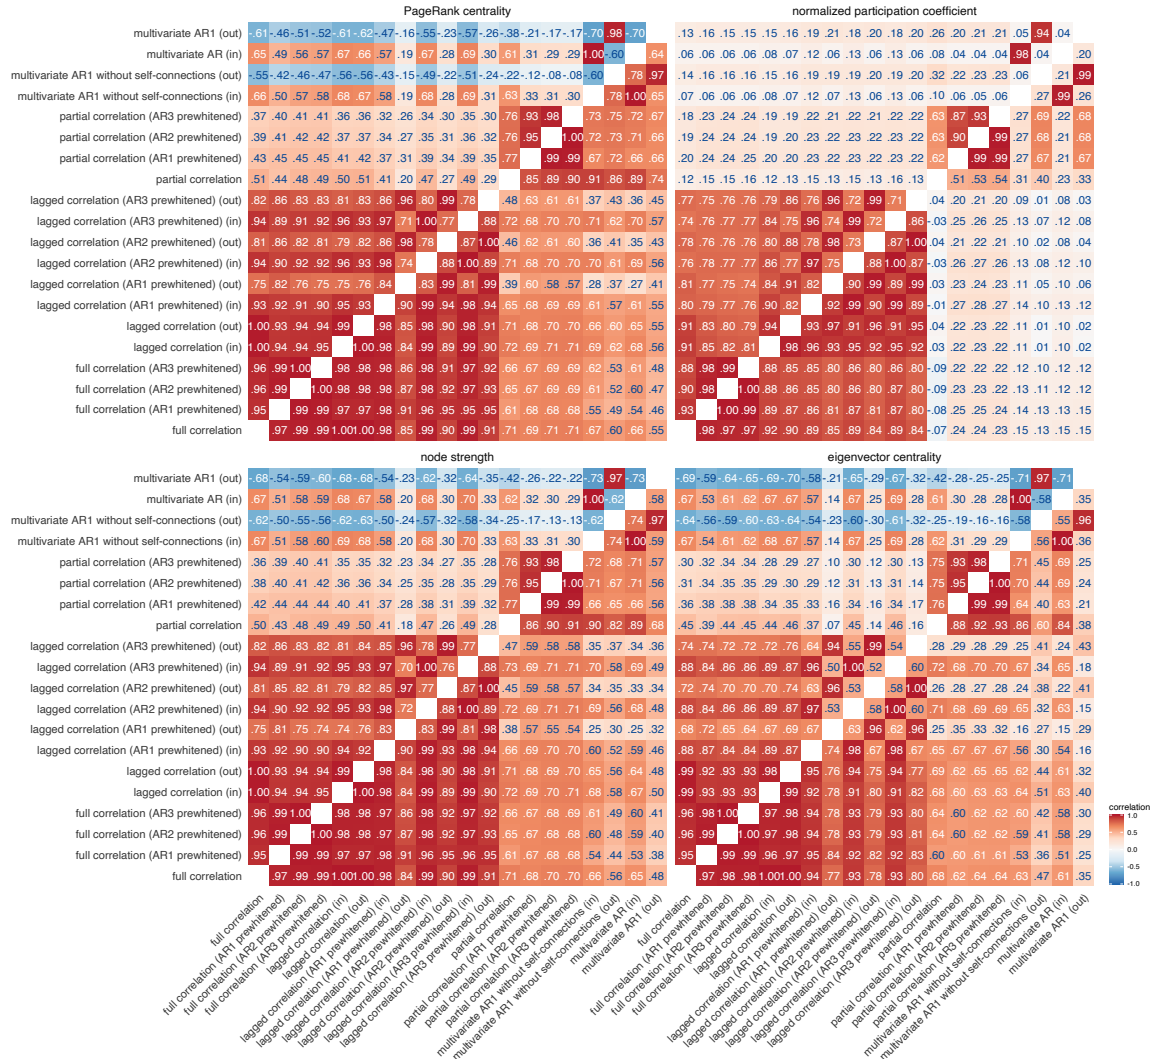

Figure S5: **Similarities between node centrality measures based on positive connections.** Similarities were estimated by (i) computing node measures on group-averaged connectivity matrices (group-level comparison; below diagonal), (ii) by computing node measures for each individual separately, correlating within participants and averaging these correlations across participants (individual-level comparison; above diagonal). Similar to Figure S4, but for negative connections.

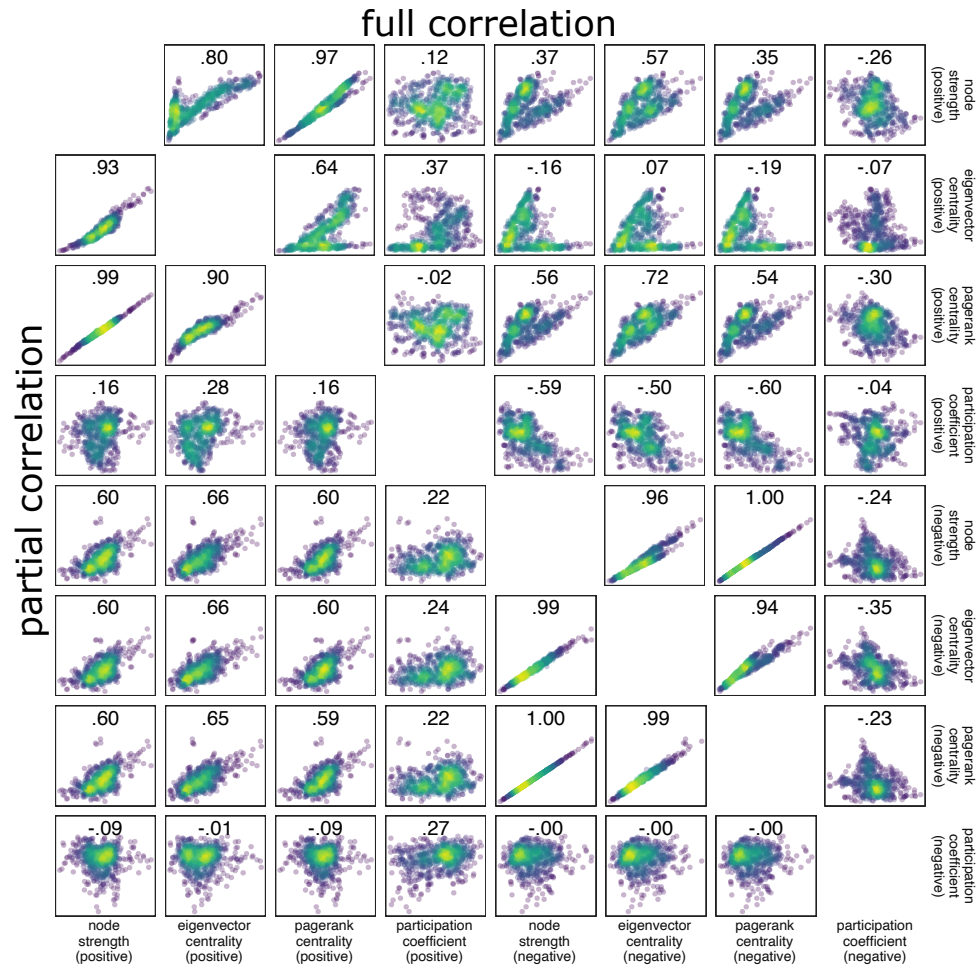

**Figure S6: Correlations between centrality measures for static FC methods at the group level.** Correlations were computed separately for positive and negative connections. We observed a positive correlation between the participation coefficient of positive connections and strength-based measures of negative connections. This suggests that nodes that participate in different modules tend to have fewer negative connections. Importantly, this finding highlights the functional importance of negative connections. However, for partial correlation networks, a positive correlation was found between strength-based measures and the participation coefficient. This suggests that indirect negative connections drive the negative relationship between participation coefficient and strength. In other words, nodes that participate in different modules tend to have more indirect negative functional connections, compared to nodes with low participation coefficient.

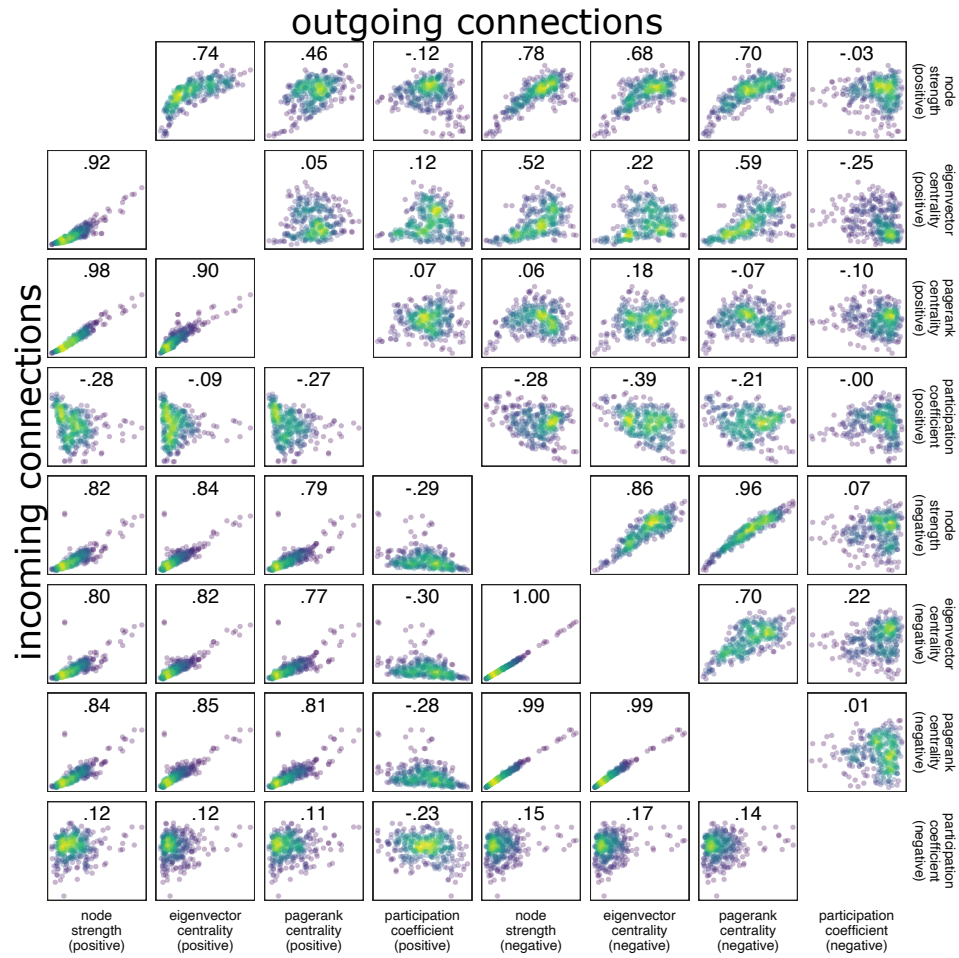

Figure S7: **Correlations between centrality measures for the multivariate autoregressive model at the group level.** Correlations were computed separately for positive and negative connections. The scatter plots above the diagonal refer to outgoing connections, while the scatter plots below the diagonal refer to incoming connections.

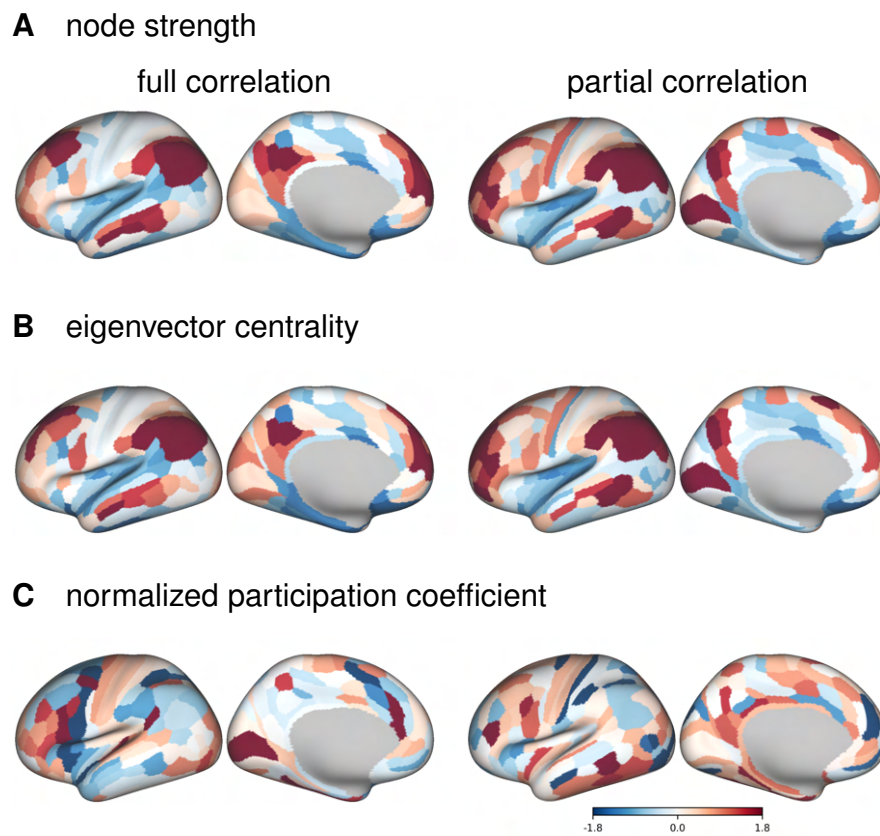

Figure S8: **Cortical distribution of centrality measures for static FC methods and for negative connections.** PageRank centrality is omitted, because its correlation with strength is equal to 1. The values have been transformed to z-values for visualization.



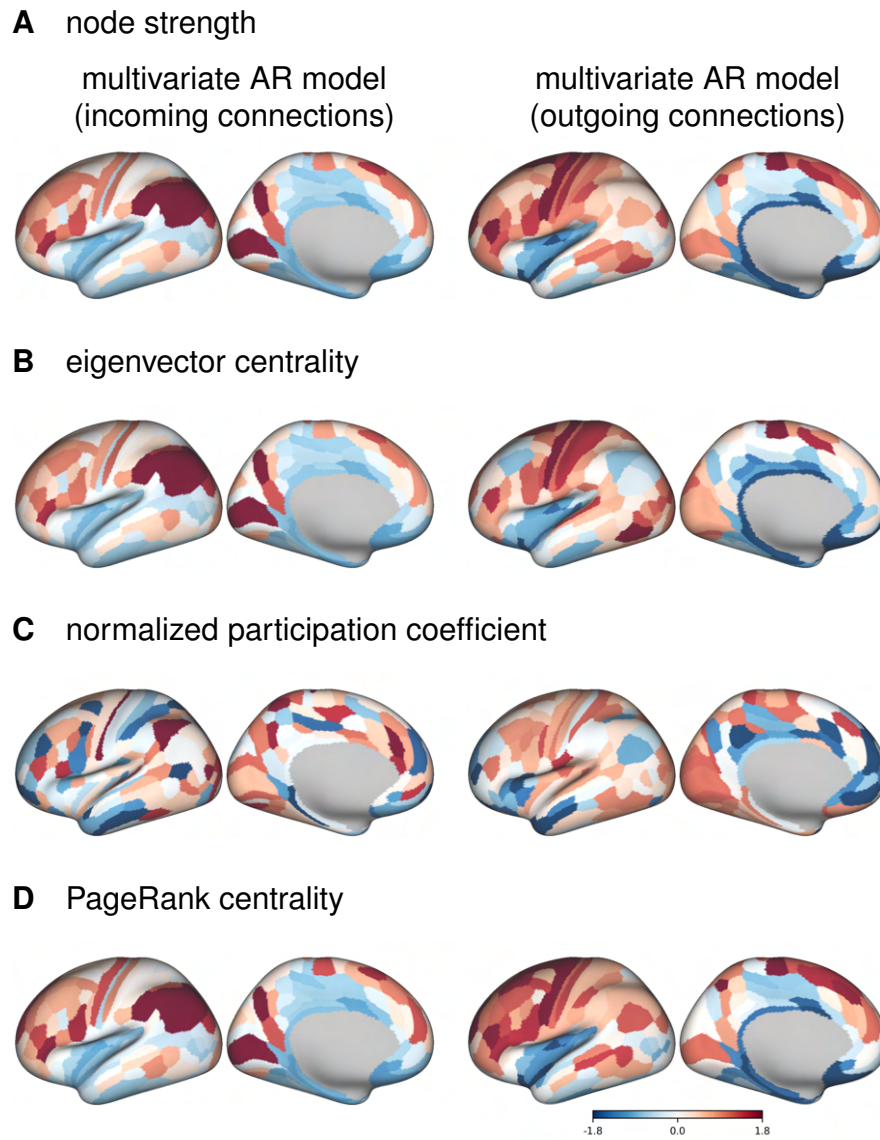

Figure S9: **Cortical distribution of centrality measures for multivariate autoregressive model and for negative connections.**

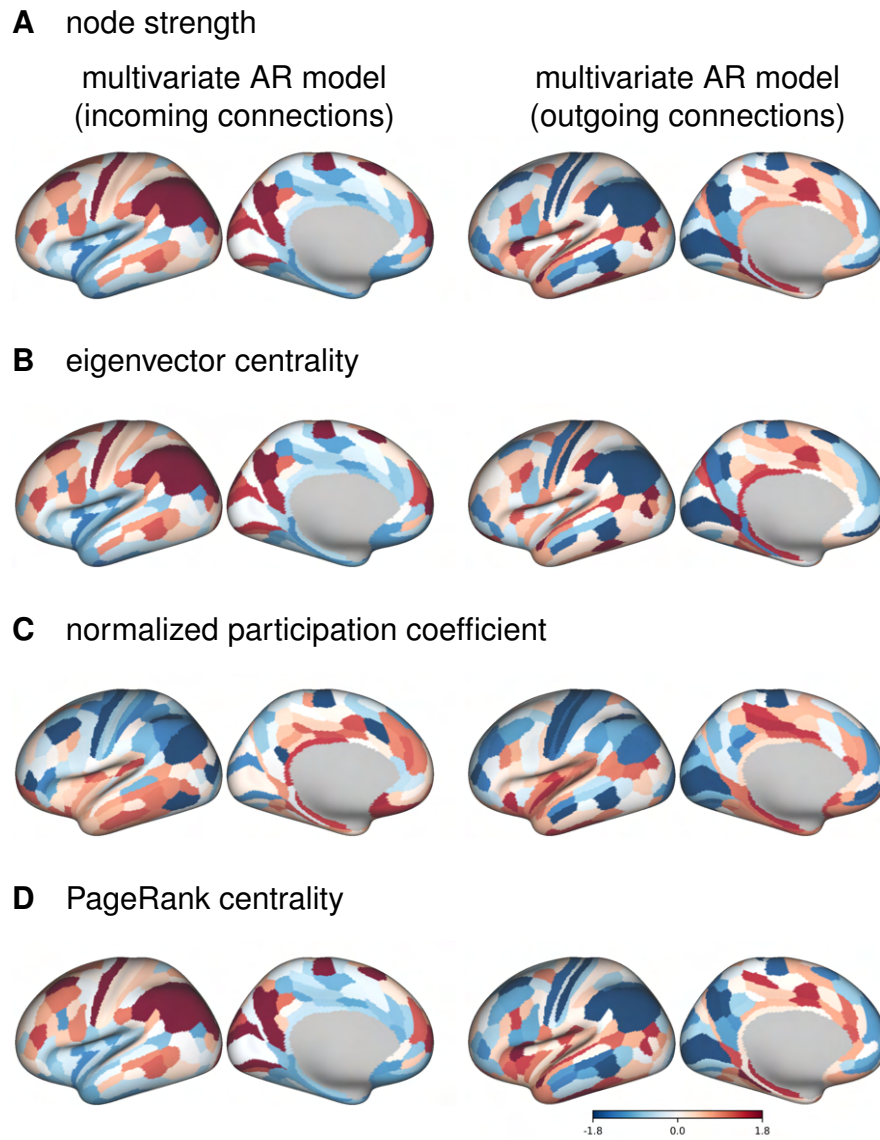

Figure S10: Cortical distribution of centrality measures for HCP subject 100307 for multivariate autoregressive model and for negative connections.

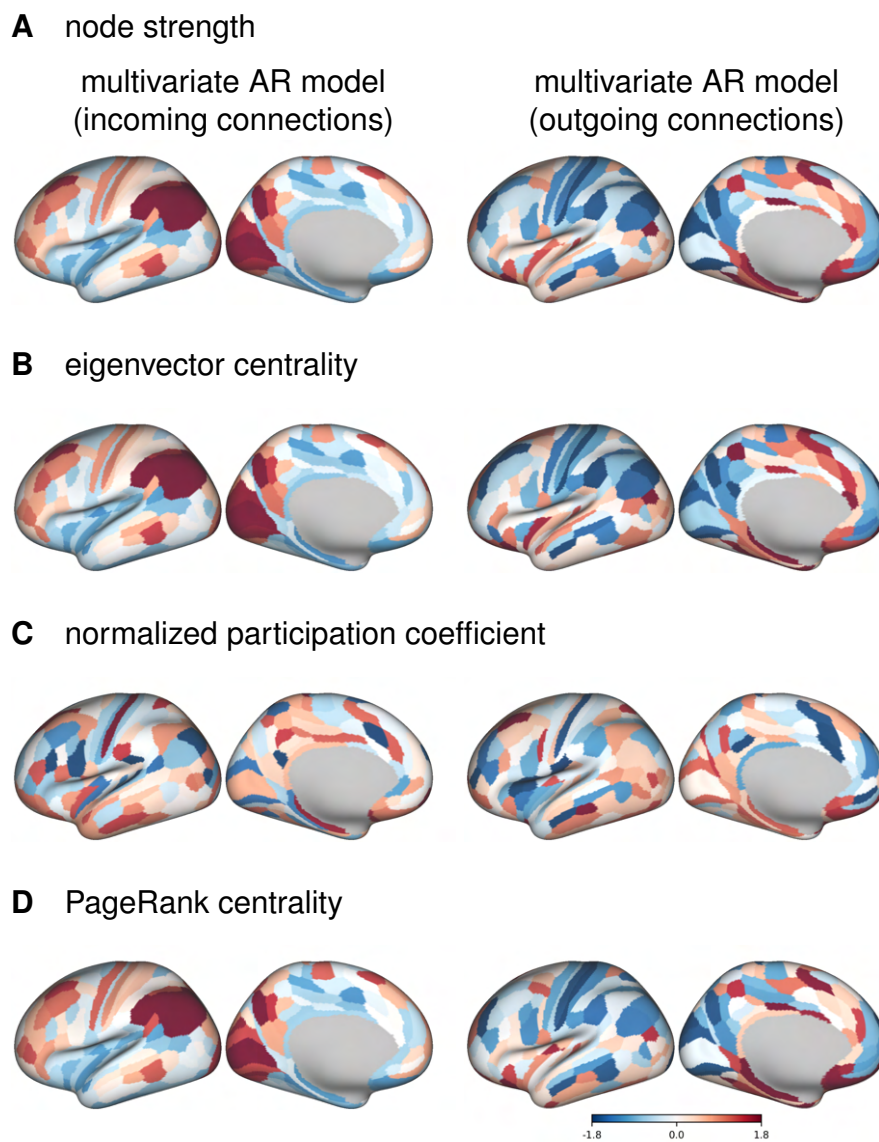

Figure S11: Cortical distribution of centrality measures for HCP subject 100307 for multivariate autoregressive model and for negative connections.

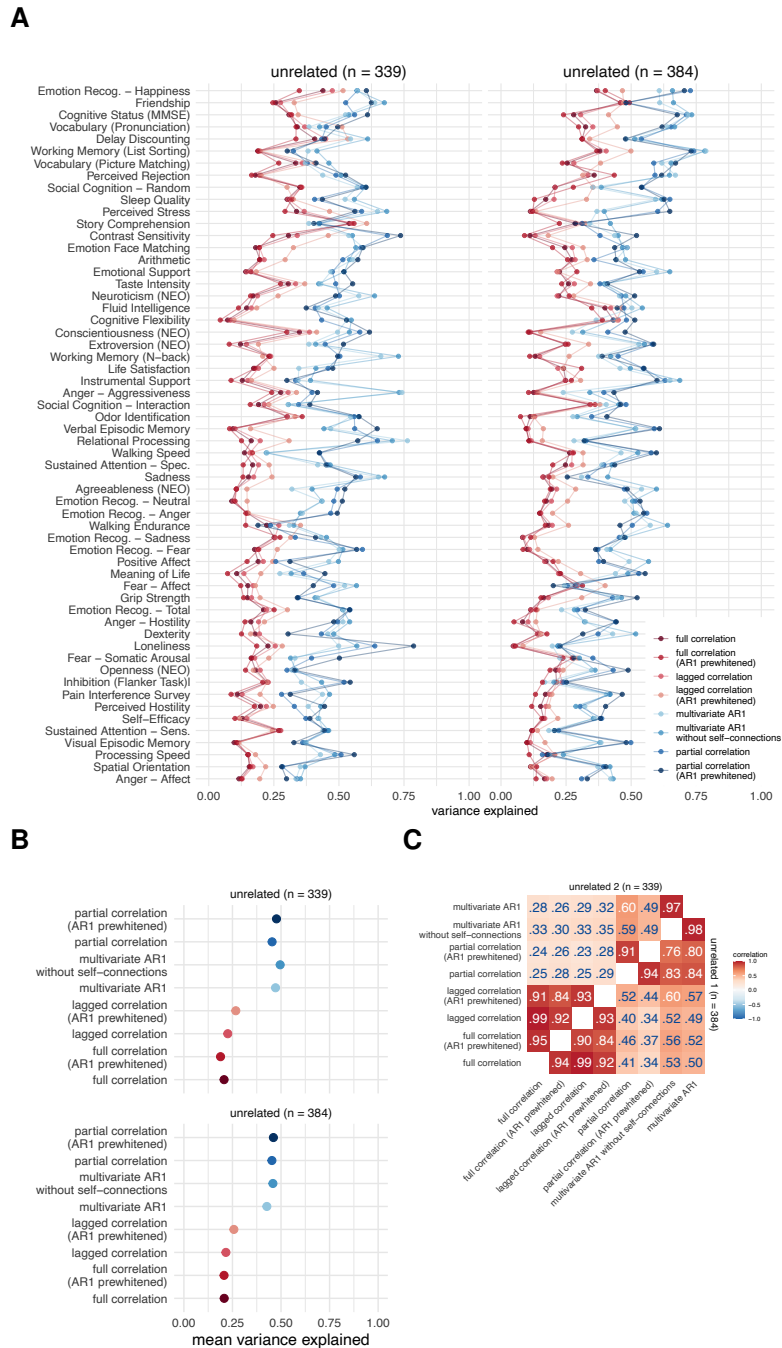

Figure S12: **Results of variance component model for brain-behavior associations on subsamples of unrelated participants.** (A) Variance explained for individual traits estimated with different connectivity methods, (B) mean variance explained, and (C) similarities of explained variance patterns between connectivity methods. The traits are ordered according to the mean variance explained across connectivity methods. The same as in Figure 7 but in subsamples of unrelated participants.

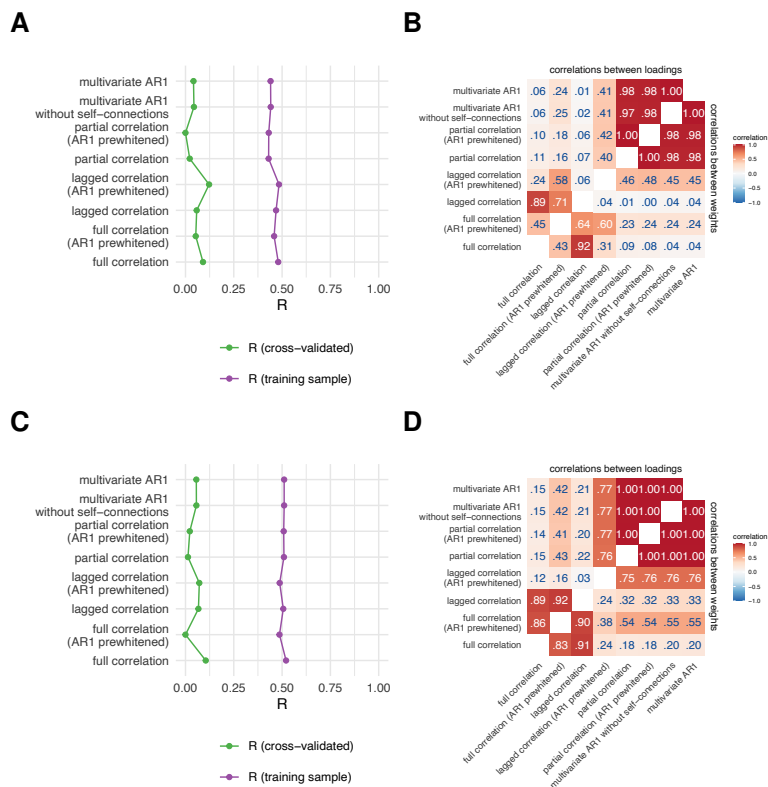

Figure S13: **Results of canonical correlation analysis for brain-behavior associations on subsamples of unrelated participants.** (A,C) First canonical correlation on test and training sets in the first (A,  $n = 384$ ) and second subsample (C,  $n = 339$ ). (B,D) Correlations between canonical loadings and weights across FC methods for the first canonical components on the first (B) and second (D) subsamples.

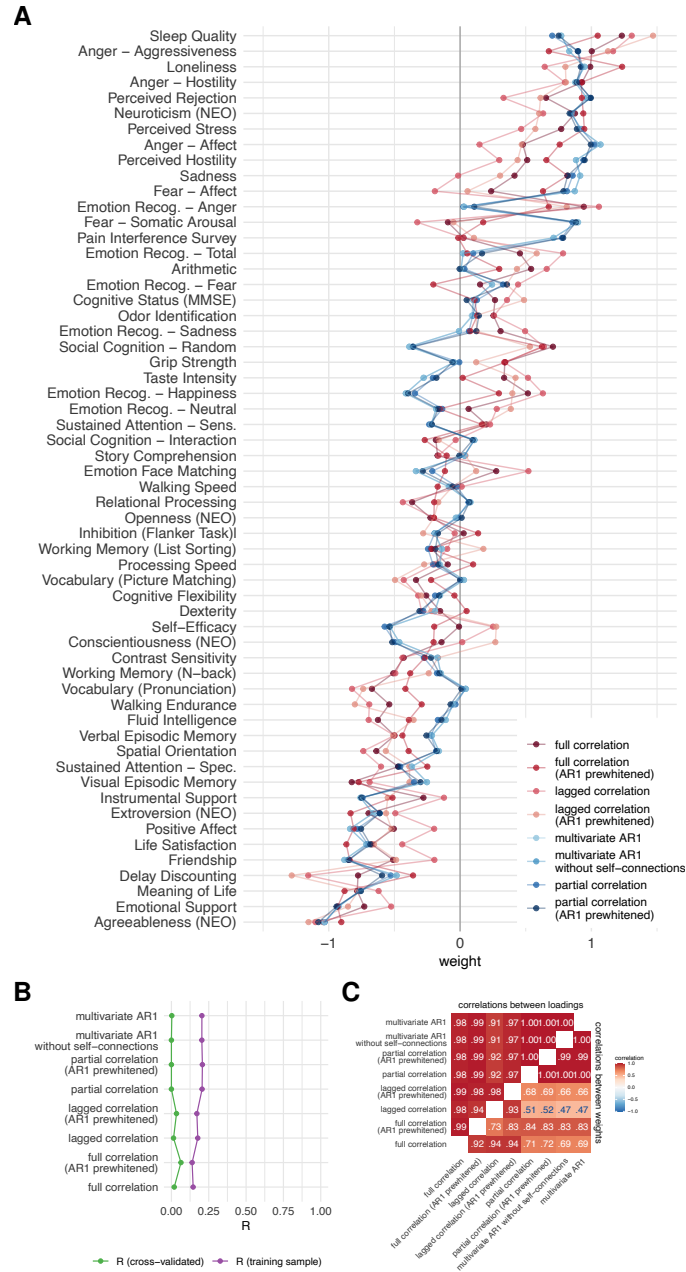

Figure S14: Results of principal least squares analysis for brain-behavior associations. A. PLS weights. B. First canonical correlation on test and training sets. C. Correlations between canonical loadings and weights across functional connectivity methods for first canonical components.

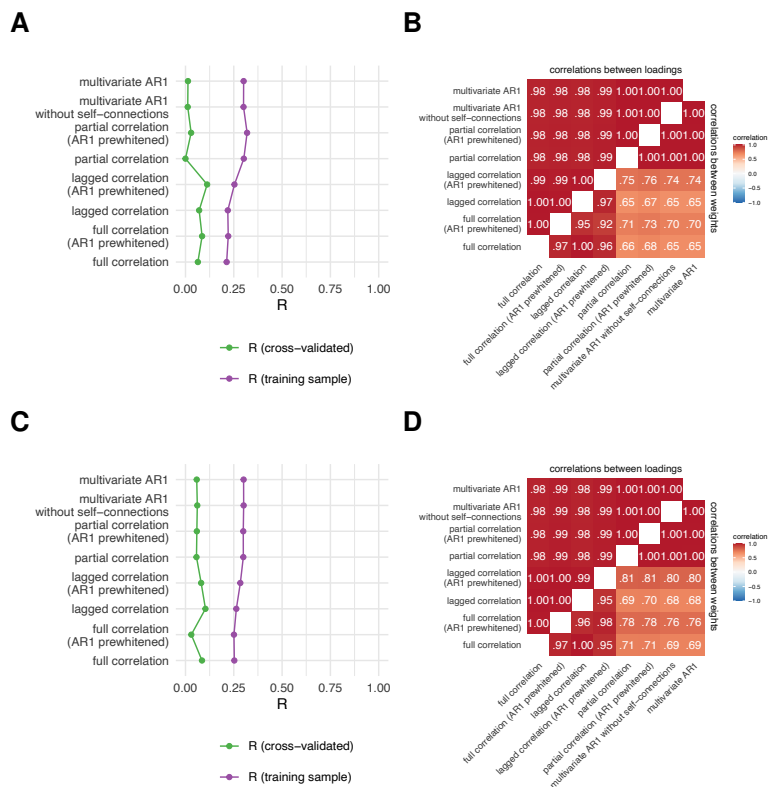

Figure S15: **Results of principal least squares analysis for brain-behavior associations on subsamples of unrelated participants.** (A,C) First canonical correlation on test and training sets in the first (A,  $n = 384$ ) and second subsample (C,  $n = 339$ ). (B,D) Correlations between canonical loadings and weights across FC methods for the first canonical components on the first (B) and second (D) subsamples.

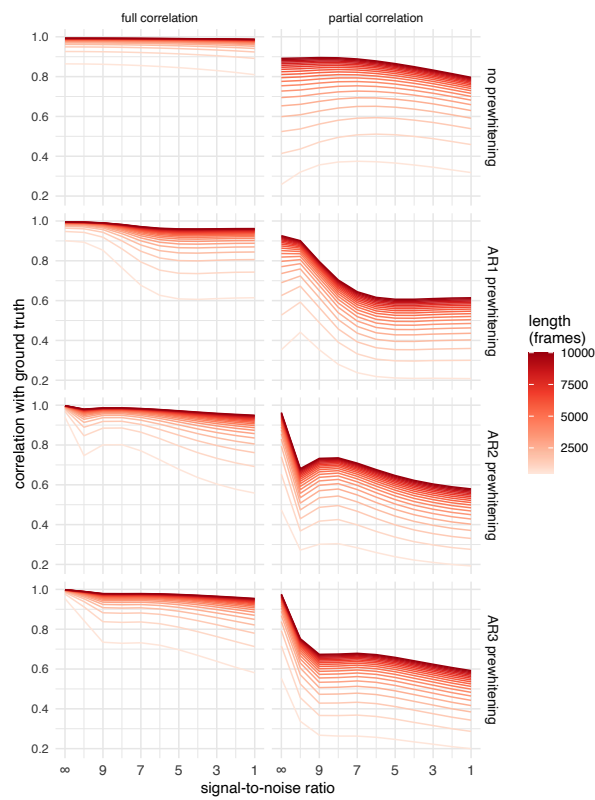

Figure S16: **Correlation between ground truth and simulated data for all FC methods in association with noise and signal length.** Same as in Figure 11B but includes all orders of prewhitening.



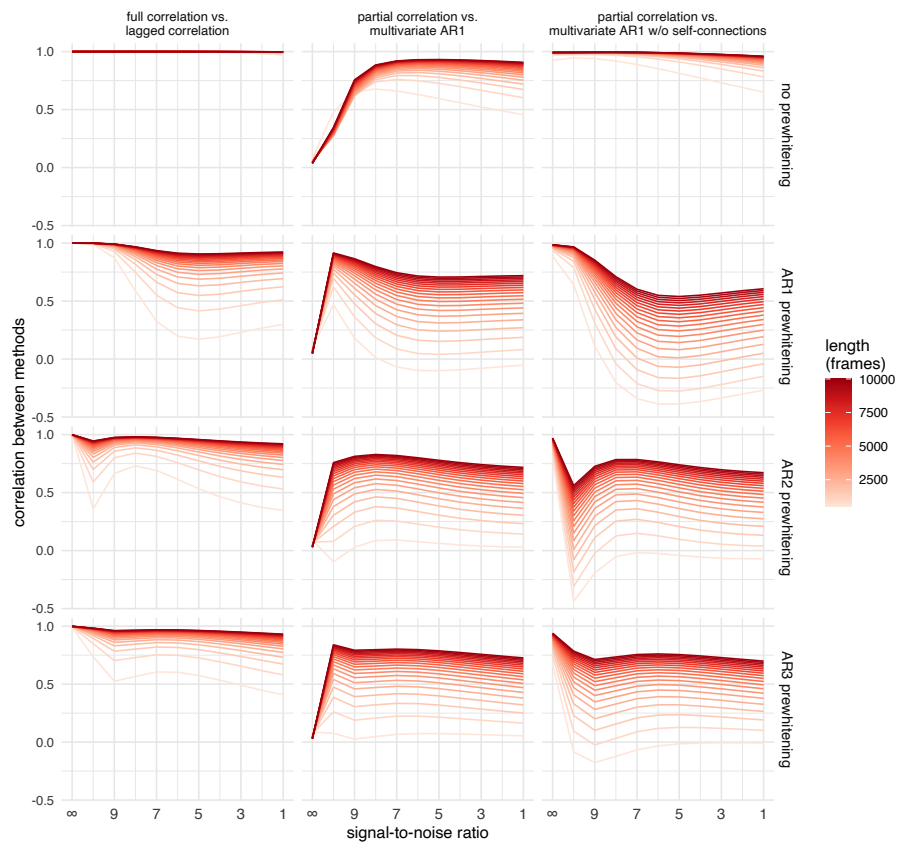

Figure S17: **Correlation between selected pairs of FC methods as a function of noise and signal length on simulated data.** Same as in Figure 11C but includes all prewhitening orders.

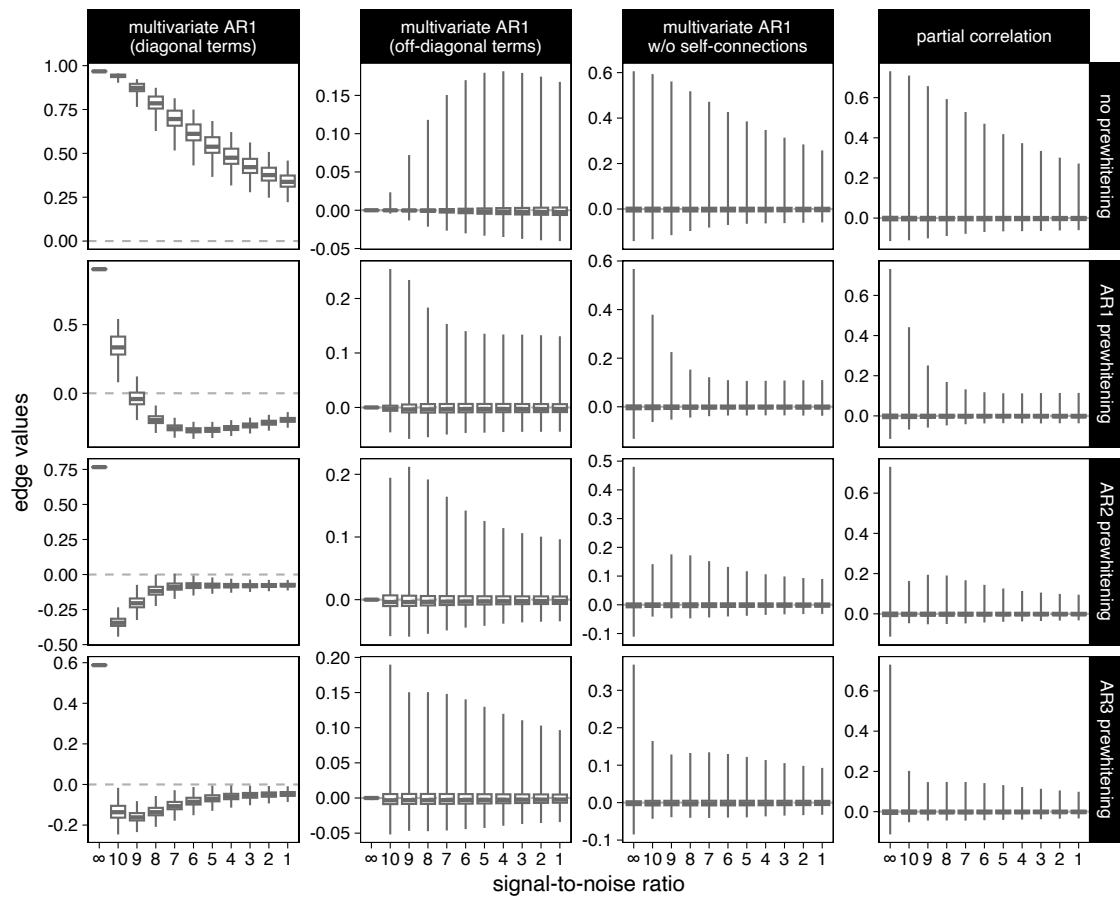

Figure S18: **Distributions of edge values on simulated data for selected FC methods as a function of noise for the signals with the longest length (10000 frames).** The distributions are based on the average FC matrix across simulated participants. The boxplot whiskers represent the minimum and maximum values.

| HCP Field                                | Friendly Name                  | HCP Field        | Friendly Name              |
|------------------------------------------|--------------------------------|------------------|----------------------------|
| PicSeq_Unadj                             | Visual Episodic Memory         | WM_Task_Acc      | Working Memory (N-back)    |
| CardSort_Unadj                           | Cognitive Flexibility          | NEOFAC_A         | Agreeableness (NEO)        |
| Flanker_Unadj                            | Inhibition (Flanker Task)      | NEOFAC_O         | Openness (NEO)             |
| PMAT24_A_CR                              | Fluid Intelligence             | NEOFAC_C         | Conscientiousness (NEO)    |
| ReadEng_Unadj                            | Vocabulary (Pronunciation)     | NEOFAC_N         | Neuroticism (NEO)          |
| PicVocab_Unadj                           | Vocabulary (Picture Matching)  | NEOFAC_E         | Extroversion (NEO)         |
| ProcSpeed_Unadj                          | Processing Speed               | ER40_CR          | Emotion Recog. - Total     |
| DDisc_AUC_40K                            | Delay Discounting              | ER40ANG          | Emotion Recog. - Anger     |
| VSPLIT_TC                                | Spatial Orientation            | ER40FEAR         | Emotion Recog. - Fear      |
| SCPT_SEN                                 | Sustained Attention - Sens.    | ER40HAP          | Emotion Recog. - Happiness |
| SCPT_SPEC                                | Sustained Attention - Spec.    | ER40NOE          | Emotion Recog. - Neutral   |
| IWRD_TOT                                 | Verbal Episodic Memory         | ER40SAD          | Emotion Recog. - Sadness   |
| ListSort_Unadj                           | Working Memory (List Sorting)  | AngAffect_Unadj  | Anger - Affect             |
| MMSE_Score                               | Cognitive Status (MMSE)        | AngHostil_Unadj  | Anger - Hostility          |
| PSQI_Score                               | Sleep Quality                  | AngAggr_Unadj    | Anger - Aggressiveness     |
| Endurance_Unadj                          | Walking Endurance              | FearAffect_Unadj | Fear - Affect              |
| GaitSpeed_Comp                           | Walking Speed                  | FearSomat_Unadj  | Fear - Somatic Arousal     |
| Dexterity_Unadj                          | Dexterity                      | Sadness_Unadj    | Sadness                    |
| Strength_Unadj                           | Grip Strength                  | LifeSatisf_Unadj | Life Satisfaction          |
| Odor_Unadj                               | Odor Identification            | MeanPurp_Unadj   | Meaning of Life            |
| PainInterf_Tscore                        | Pain Interference Survey       | PosAffect_Unadj  | Positive Affect            |
| Taste_Unadj                              | Taste Intensity                | Friendship_Unadj | Friendship                 |
| Mars_Final                               | Contrast Sensitivity           | Loneliness_Unadj | Loneliness                 |
| Emotion_Task_Face_Acc                    | Emotion Face Matching          | PercHostil_Unadj | Perceived Hostility        |
| Language_Task_Math_Avg_Difficulty_Level  | Arithmetic                     | PercReject_Unadj | Perceived Rejection        |
| Language_Task_Story_Avg_Difficulty_Level | Story Comprehension            | EmotSupp_Unadj   | Emotional Support          |
| Relational_Task_Acc                      | Relational Processing          | InstruSupp_Unadj | Instrumental Support       |
| Social_Task_Perc_Random                  | Social Cognition - Random      | PercStress_Unadj | Perceived Stress           |
| Social_Task_Perc_TOM                     | Social Cognition - Interaction | SelfEff_Unadj    | Self-Efficacy              |

Table S1: Behavioral measures.
